# Supplementary material for: Identification of Transcription Factors Responsible for a Transforming Growth Factor-β-Driven Hypertrophy-like Phenotype in Human Osteoarthritic Chondrocytes
Source: MDPI journal article supplement (doi:10.3390/cells11071232), 2022-04-05
Supplement: s1 [file s1]

**Table S1.** Full promoter sequences containing transcription factor elements (**bold**) driven by a minimal promoter including a TATA-box (underlined).

| Pathway                  | Binding site | Sequence                                                                                                                                                                                                                                                                                                                                                                                                                       |
|--------------------------|--------------|--------------------------------------------------------------------------------------------------------------------------------------------------------------------------------------------------------------------------------------------------------------------------------------------------------------------------------------------------------------------------------------------------------------------------------|
| MAPK/JNK                 | AP1          | TGAGTCAGTGACTCAGTGAGTCAGTGACTCAGTGAGTCAGTGACTCAGCTC<br>GAGGATATCAAGATCTGGCCTCGGCGGCCAAGCTTAGACACT <u>AGAGGGTATATA</u><br><u>TAATGGAAGCTCGACTTCCAG</u>                                                                                                                                                                                                                                                                          |
| SOX9                     | SOX9         | AGAACAATGGAGAACAATGGAGAACAATGGAGAACAATGGAGAACAATGG<br>AGAACAATGGAGAACAATGGCTCGAGGATATCAAGATCTGGCCTCGGCGGCC<br>AAGCTTAGACACT <u>AGAGGGTATATAATGGAAGCTCGACTTCCAG</u><br>GGGAATTTCCGGGGACTTTCCGGGAATTTCCGGGGACTTTCCGGGAATTTCC                                                                                                                                                                                                     |
| NFκB                     | NFκB         | AGATCTGGCCTCGGCGGCCTAGATGAGACACT <u>AGAGGGTATATAATGGAAGC</u><br><u>TCGACTTCCAG</u>                                                                                                                                                                                                                                                                                                                                             |
| Notch                    | CSL          | CGTGGGAAAATGGGCGGAAGGGCACCCTGGGAAAATAGTTGATCCCGACT<br>CGTGGGAAAATGGGCGGAAGGGCACCCTGGGAAAATAGTTGATCCCGACT<br>CGTGGGAAAAGGGCGGAAGGGCACCCTGGGAAAATAGTTGATCTGATGTA<br>CAAGATCCCGACTCGTGGGAAAATGGGCGGAAGGGCACCCTGGGAAAATA<br>GTTGATCCCGACTCGTGGGAAAATGGGCGGAAGGGCACCCTGGGAAAATA<br>GTTGATCCCGACTCGTGGGAAAAGGGCGGAAGGGCACCCTGGGAACTCGA<br>GGATATCAAGATCTGGCCTCGGCGGCCAAGCTTAGACACT <u>AGAGGGTATATA</u><br><u>ATGGAAGCTCGACTTCCAG</u> |
| cAMP/PKA                 | CRE          | TGACGTCAGTGCCAGATCCCATGGCCGTCATACTGTGACGTCTTTCAGACA<br>CCCCATTGACGTCATGGGAGAACAGATCTGGCCTCGGCGGCCAAGCTTAGA<br>CACTAGAGGGTATATAATGGAAGCTCGACTTCCAG                                                                                                                                                                                                                                                                              |
| Glucocorticoid signaling | GRE          | AGAACAATTTGTCCGAGAACATTTGTCCGAGAACATTTGTCCGAGAACAT<br>TTTGTCCGAGAACATTTGTCCGAGAACATTTGTCCGCTCGAGGATATCAAG<br>ATCTGGCCTCGGCGGCCAAGCTTAGACACT <u>AGAGGGTATATAATGGAAGCTCG</u><br><u>ACTTCCAG</u>                                                                                                                                                                                                                                  |
| TGF-β                    | SBE          | AGTATGTCTAGACTGAAGTATGTCTAGACTGAAGTATGTCTAGACTGACTCG<br>AGGATATCAAGATCTGGCCTCGGCGGCCTAGATGAGACACT <u>AGAGGGTATAT</u><br><u>AATGGAAGCTCGACTTCCAG</u>                                                                                                                                                                                                                                                                            |
| Wnt                      | TCF/LEF      | AGATCAAAGGGTTAAGATCAAAGGGCTTAAGATCAAAGGGTATAAGATCA<br>AAGGGCCTAAGATCAAAGGGACTAAGATCAAAGGGTTAAGATCAAAGGG<br>CTTAAGATCAAAGGGCCTACTCGAGGATATCAAGATCTGGCCTCGGCGGCCA<br>AGCTTAGACACT <u>AGAGGGTATATAATGGAAGCTCGACTTCCAG</u><br>TAGTTTCACTTTCCCTAGTTTCACTTTCCCTAGTTTCACTTTCCCTAGTTTAC                                                                                                                                                |
| INF-α                    | ISRE         | TTTCCCTAGTTTCACTTTCCCTCGAGGATATCAAGATCTGGCCTCGGCGGCC<br>AAGCTTAGACACTAGAGGGTATATAATGGAAGCTCGACTTCCAG                                                                                                                                                                                                                                                                                                                           |
| IL-6                     | SIE          | AGCTTCATTTCCCGTAAATCGTCGAAGCTTCATTTCCCGTAAATCGTCGAAG<br>CTTCATTTCCCGTAAATCGTCGAAGCTTCATTTCCCGTAAATCGTCGAAGCTT<br>CATTTCCCGTAAATCGTCGACTCGAGGATATCAAGATCTGGCCTCGGCGGCCA<br>AGCTTAGACACTAGAGGGTATATAATGGAAGCTCGACTTCCAG                                                                                                                                                                                                          |
| MAPK/ERK                 | SRE          | AGGATGTCCATATTAGGACATCTAGGATGTCCATATTAGGACATCTAGGATG<br>TCCATATTAGGACATCTAGGATGTCCATATTAGGACATCTAGGATGTCCATA<br>TTAGGACATCTAGATCTGGCCTCGGCGGCCAAGCTTAGACACT <u>AGAGGGTAT</u><br><u>ATAATGGAAGCTCGACTTCCAG</u>                                                                                                                                                                                                                  |
| RhoA                     | SRF          | AGTATGTCCATATTAGGACATCTACCATGTCCATATTAGGACATCTACTATGT<br>CCATATTAGGACATCTTGATGTCCATATTAGGACATCTAAAATGTCCATATT<br>AGGACATCTAGATCTGGCCTCGGCGGCCAAGCTTAGACACT <u>AGAGGGTATAT</u><br><u>AATGGAAGCTCGACTTCCAG</u>                                                                                                                                                                                                                   |
| Oxidative stress         | ARE          | TAGCTTGGAAATGACATTGCTAATGGTGACAAAGCAACTTTTAGCTTGGAAA<br>TGACATTGCTAATGGTGACAAAGCAACTTTCTCGAGGATATCAAGATCTGGC<br>CTCGGCGGCCAAGCTTAGACACT <u>AGAGGGTATATAATGGAAGCTCGACTTCCA</u><br><u>G</u>                                                                                                                                                                                                                                      |
| Hyperosmotic signaling   | NFAT5        | TGGAAAAGTCCATGGAAAAGTCCATGGAAAAGTCCATGGAAAAGTCCATGG<br>AAAAGTCCATGGAAAAGTCCATGGAAAAGTCCATGGAAAAGTCCACTCGAG<br>GATATCAAGATCTGGCCTCGGCGGCCAAGCTTAGACACT <u>AGAGGGTATATAAT</u><br><u>GGAAGCTCGACTTCCAG</u>                                                                                                                                                                                                                        |
| PPARγ                    | PPRE         | GTCGACAGGGGACCAGGACAAAGGTCACGTTCCGGAGTCGACAGGGGACC<br>AGGACAAAGGTCACGTTCCGGAGTCGACAGGGGACCAGGACAAAGGTCAC<br>GTTCCGGAGTCGACCTCGAGGATATCAAGATCTGGCCTCGGCGGCCAAGCTT<br>AGACACTAGAGGGTATATAATGGAAGCTCGACTTCCAG                                                                                                                                                                                                                     |

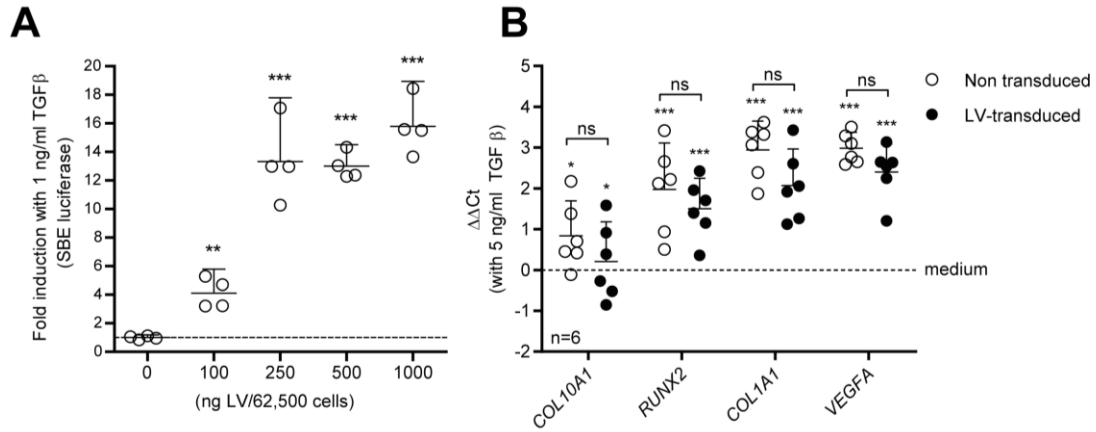

**Figure S1.** Primary human OA chondrocytes can be efficiently transduced with lentivirus, thereby not affecting TGF-β1-induced signaling. To identify which transcription factors (TF) were activated by TGF-β1 in primary human OA chondrocytes, we made use of luciferase-based TF activity assays. Binding sequences specific for 15 different transcription factors extended with a minimal promoter were directionally cloned into the pNL1.2 vector. Subsequently, lentiviral constructs were generated and in Lenti-X 293T cells viral supernatants were produced using 1 mg/ml polyethylenimine (PEI). Viral supernatant was concentrated and lentiviral concentration was determined using p24 ELISA assay. **(A)** First, transduction protocol was optimized in primary human OA chondrocytes using lentivirus (LV) containing the SBE-pNL1.2 luciferase construct. Human OA chondrocytes (n=1), cultured for a week to form a monolayer, were transduced for 6-8 hours with different concentrations LV (0, 100, 250, 500 and 1000 ng) per 62,500 cells. After 48 hours the transduced cells were stimulated with 1 ng/ml TGF-β1 for 6 hours. Luminescence was measured at 470-480 nm and fold induction compared to medium-stimulated cells was calculated. Each condition was performed in quadruple and 95% CI was depicted. **(B)** Using qPCR we checked if lentiviral transduction with 500 ng LV/62,500 cells did not affect running of our TGF-β-driven chondrocyte hypertrophy-like model. Stimulation for 48 hours with 5 ng/ml TGF-β resulted in increased gene expression of *COL10A1*, *RUNX2*, *COL1A1* and *VEGFA* in both non transduced (white dots) and LV-transduced (black dots) OA chondrocytes (n=6). Data are plotted as mean ± 95% CI with each dot representing the average of three technical replicates in one chondrocyte donor. Statistical analysis was performed using repeated measures one-way ANOVA with Bonferroni's post hoc test: ns = non-significant; \* p ≤ 0.05; \*\* p ≤ 0.01; \*\*\* p < 0.001.

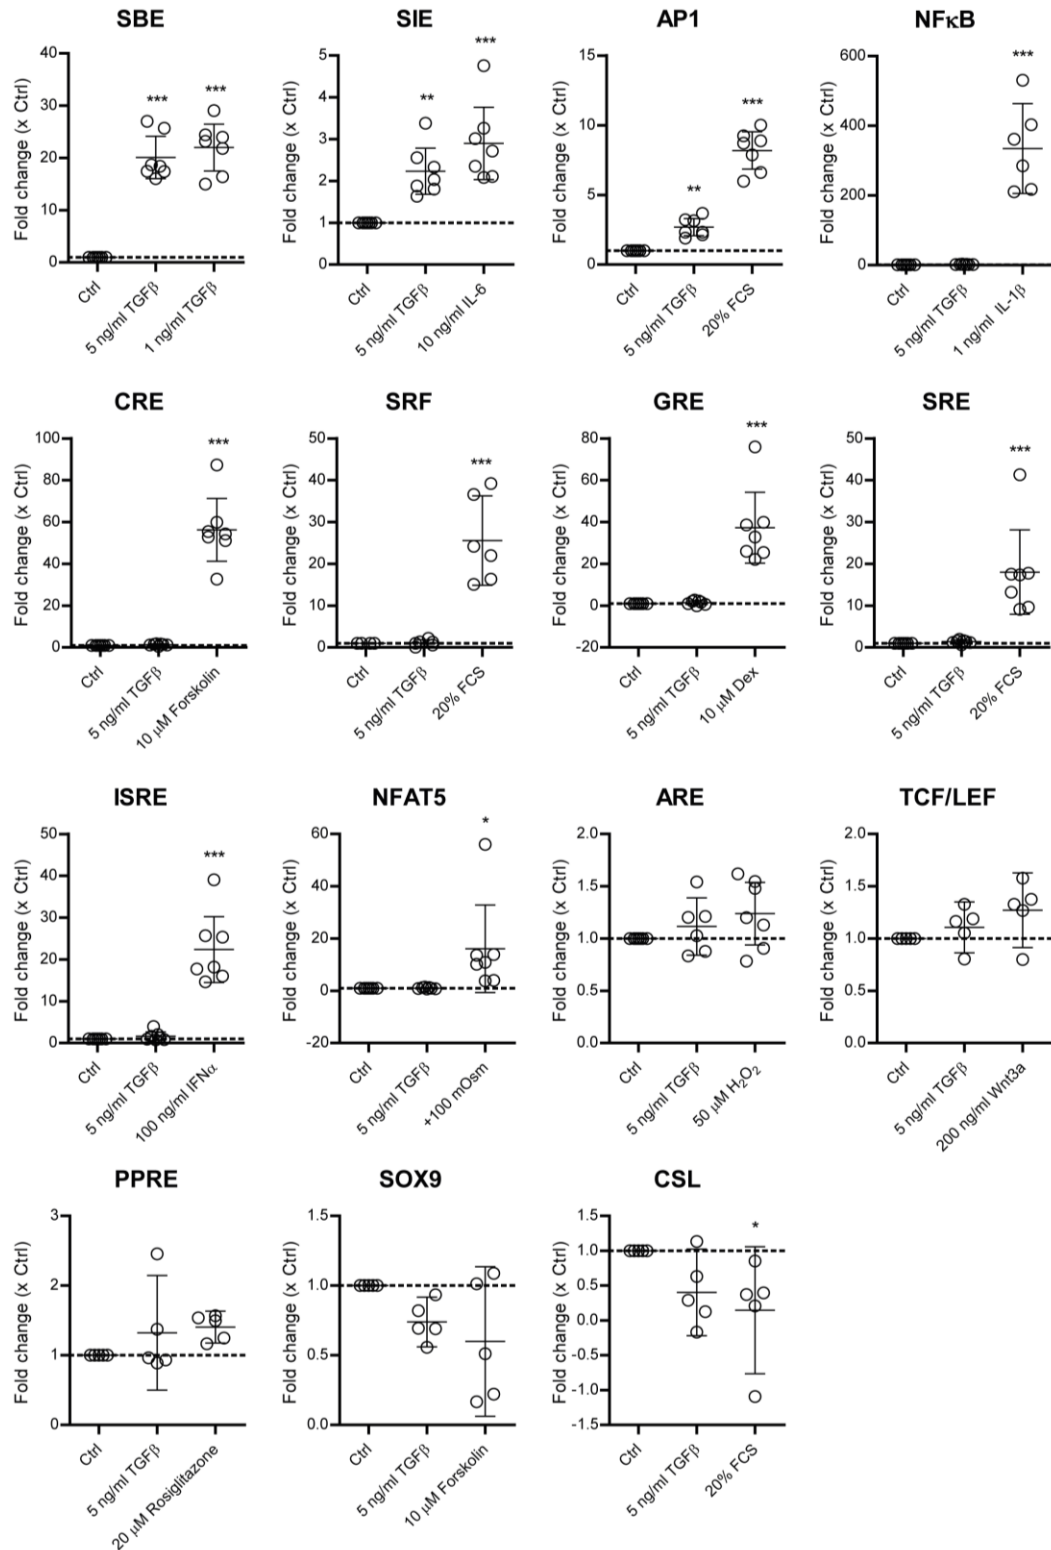

**Figure S2.** Investigation of transcription factor activation by 5 ng/ml TGF-β1 in primary human OA chondrocytes. To identify which transcription factors (TF) were activated by TGF-β1 in primary human OA chondrocytes, we made use of luciferase-based TF activity assays. Binding sequences specific for 15 different transcription factors (SBE, SIE, AP1, NFκB, CRE, SRF, GRE, SRE, ISRE, NFAT5, TCF/LEF, PPRE, SOX9, CSL and ARE) extended with a minimal promoter were directionally cloned into the pNL1.2 vector. Subsequently, lentiviral constructs were generated and in Lenti-X 293T cells viral supernatants were produced using 1 mg/ml polyethylenimine (PEI). Viral supernatant was concentrated and lentiviral concentration was determined using p24 ELISA assay. Primary human OA chondrocytes, cultured for a week to form a monolayer, were transduced for 6-8 hours with 500 ng of lentivirus per 62,500 cells. After 48 hours the transduced cells were stimulated with

a positive control, and with 5 ng/ml TGF- $\beta$ 1 for 6 hours. Luminescence was measured at 470-480 nm and fold change compared to medium-stimulated cells (Ctrl) was calculated. Data are plotted as mean  $\pm$  95% CI with each dot representing the average of a quadruple sample in one chondrocyte donor. Statistical analysis was performed using an repeated measures one-way ANOVA with Bonferroni's post hoc test: \*  $\leq 0.05$ ; \*\*  $p \leq 0.01$ ; \*\*\*  $p < 0.001$ .

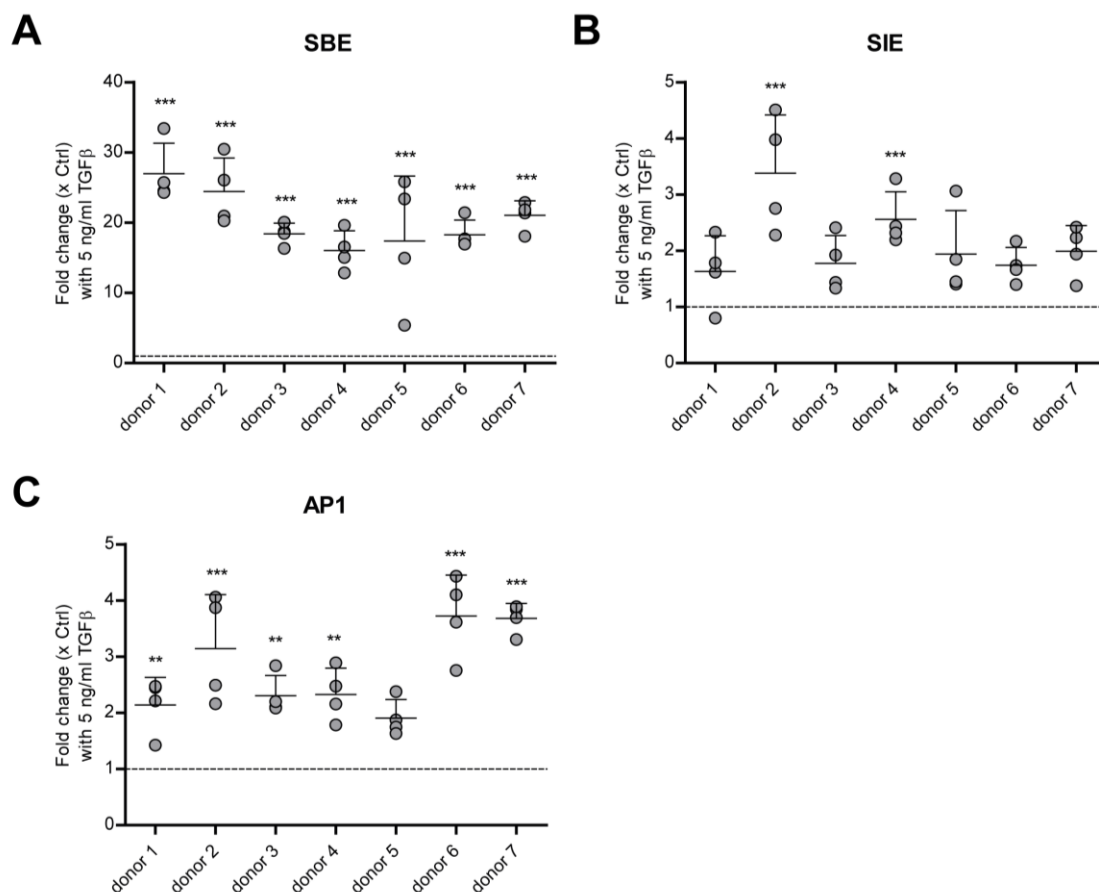

**Figure S3.** TGF- $\beta$ 1 activates SMAD3:4, STAT3 and AP1 signaling in human OA chondrocytes. Primary human OA chondrocytes (n=7), cultured for a week to form a monolayer, were transduced for 6-8 hours with 500 ng of lentivirus per 62,500 cells. After 48 hours the transduced cells were serum-starved overnight and then stimulated with a positive control, and with 5 ng/ml TGF- $\beta$ 1 for 6 hours. Luminescence was determined at 470-480nm and fold change compared to medium-stimulated cells was calculated. TGF- $\beta$ 1 activated cell signaling regulated by the transcription factors (A) SMAD3:4 (SBE: SMAD Binding Element), (B) STAT3 (SIE: Interleukin (IL)-6 sis-inducible element or STAT3 response element) and (C) AP1 (Activation Protein 1). The fold change with 5 ng/ml TGF- $\beta$ 1 is depicted per donor (quadruple sample  $\pm$  95% CI). Statistical analysis was performed using an one-way ANOVA with Bonferroni's post hoc test: \*\*  $p \leq 0.01$ ; \*\*\*  $p < 0.001$ .

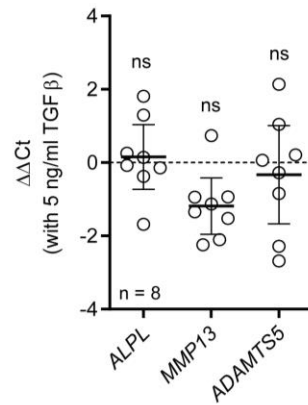

**Figure S4.** Late-hypertrophic genes *ALPL*, *MMP13* and *ADAMTS5* are not increased by TGF- $\beta$ 1 in primary human OA chondrocytes. Human chondrocytes of eight donors were cultured in monolayer and stimulated with 10 ng/ml TGF- $\beta$ 1 48 hours. No significant differences were observed on relative *alkaline phosphatase* (*ALPL*), *matrix metalloproteinase 13* (*MMP13*) and *ADAM Metalloproteinase with thrombospondin type 1 motif 5* (*ADAMTS5*) expression, all late-hypertrophic genes. Data are plotted as mean  $\pm$  95% CI with each dot representing the average of three technical replicates in one chondrocyte donor. Statistical analysis was performed using an one-way ANOVA with Bonferroni's post hoc test: ns = non-significant.
